# Supplementary material for: Analytical Characterization of Water-Soluble Constituents in Olive-Derived By-Products
Source: MDPI journal article supplement (doi:10.3390/foods10061299), 2021-06-05
Supplement: s1 [file s1]

Table S1. Presence of each compound category detected in the aqueous extractives fraction with respect to the whole biomass (% w/w of total biomass)

| <b>Compound</b>           | <b>OTP</b> | <b>OL</b> | <b>OS</b> | <b>EOP</b> |
|---------------------------|------------|-----------|-----------|------------|
| Free Sugars               | 4.94       | 1.94      | 0.14      | 8.45       |
| Alditols                  | 3.29       | 0.97      | 0.02      | 4.26       |
| Inorganic Cations         | 0.27       | 0.71      | 0.18      | 2.69       |
| Inorganic Anions          | 0.15       | 0.21      | 0.02      | 0.41       |
| Organic Acids             | 0.47       | 0.69      | 0.64      | 0.77       |
| Oligomeric Sugars         | 4.76       | 3.67      | 0.64      | 6.23       |
| Proteins                  | 0.46       | 0.14      | 0.31      | 2.56       |
| Other Inorganic Compounds | 0.22       | 0.48      | 0.10      | 3.38       |
| Total Polyphenols         | 3.54       | 2.73      | 0.62      | 7.75       |
